# Supplementary material for: Does picture background matter? Peopleʼs evaluation of pigs in different farm settings
Source: PLoS One. 2019 Feb 12;14(2):e0211256. doi: 10.1371/journal.pone.0211256 (PMC6372140; doi:10.1371/journal.pone.0211256)
Supplement: S1 File — (XLSX) [file pone.0211256.s001.xlsx]

## Sheet: Sheet1
GET
Your license will expire in 19 days.
FILE='C:\Users\GBusch\OneDrive - Scientific Network South Tyrol\Meine Daten\Projekte\Social Lab Eyetracking\Paper 1 ohne Eye\Einreichung\Revision II\Dataset_RevisionII.sav'.
DATASET NAME DataSet1 WINDOW=FRONT.
FACTOR
/VARIABLES Bew_Schwein_zufrieden Bew_Schwein_glücklich Bew_Schwein_entspannt Bew_Schwein_aktiv
Bew_Schwein_gesund Bew_Schwein_ängstlich
/MISSING LISTWISE
/ANALYSIS Bew_Schwein_zufrieden Bew_Schwein_glücklich Bew_Schwein_entspannt Bew_Schwein_aktiv
Bew_Schwein_gesund Bew_Schwein_ängstlich
/PRINT INITIAL CORRELATION KMO AIC EXTRACTION ROTATION
/FORMAT BLANK(.40)
/CRITERIA MINEIGEN(1) ITERATE(25)
/EXTRACTION PC
/CRITERIA ITERATE(25)
/ROTATION VARIMAX
/SAVE AR(ALL)
/METHOD=CORRELATION.
Factor Analysis
Notes
Output Created		12-OCT-2018 09:43:40
Comments
Input	Data	C:\Users\GBusch\OneDrive - Scientific Network South Tyrol\Meine Daten\Projekte\Social Lab Eyetracking\Paper 1 ohne Eye\Einreichung\Revision II\Dataset_RevisionII.sav
	Active Dataset	DataSet1
	Filter	<none>
	Weight	<none>
	Split File	<none>
	N of Rows in Working Data File	4076
Missing Value Handling	Definition of Missing	MISSING=EXCLUDE: User-defined missing values are treated as missing.
	Cases Used	LISTWISE: Statistics are based on cases with no missing values for any variable used.
Syntax		FACTOR /VARIABLES Bew_Schwein_zufrieden Bew_Schwein_glücklich Bew_Schwein_entspannt Bew_Schwein_aktiv Bew_Schwein_gesund Bew_Schwein_ängstlich /MISSING LISTWISE /ANALYSIS Bew_Schwein_zufrieden Bew_Schwein_glücklich Bew_Schwein_entspannt Bew_Schwein_aktiv Bew_Schwein_gesund Bew_Schwein_ängstlich /PRINT INITIAL CORRELATION KMO AIC EXTRACTION ROTATION /FORMAT BLANK(.40) /CRITERIA MINEIGEN(1) ITERATE…
Resources	Processor Time	00:00:00,08
	Elapsed Time	00:00:00,09
	Maximum Memory Required	6120 (5,977K) bytes
Variables Created	FAC1_1	Component score 1
[DataSet1] C:\Users\GBusch\OneDrive - Scientific Network South Tyrol\Meine Daten\Projekte\Social Lab Eyetracking\Paper 1 ohne Eye\Einreichung\Revision II\Dataset_RevisionII.sav
Correlation Matrix
		Bew_Schwein_zufrieden	Bew_Schwein_glücklich	Bew_Schwein_entspannt	Bew_Schwein_aktiv	Bew_Schwein_gesund	Bew_Schwein_ängstlich
Correlation	Bew_Schwein_zufrieden	1	0.874299	0.840108	0.75305	0.733474	0.688026
	Bew_Schwein_glücklich	0.874299	1	0.811299	0.754714	0.700962	0.681851
	Bew_Schwein_entspannt	0.840108	0.811299	1	0.709007	0.738025	0.671805
	Bew_Schwein_aktiv	0.75305	0.754714	0.709007	1	0.649923	0.613358
	Bew_Schwein_gesund	0.733474	0.700962	0.738025	0.649923	1	0.589152
	Bew_Schwein_ängstlich	0.688026	0.681851	0.671805	0.613358	0.589152	1
KMO and Bartlett's Test
Kaiser-Meyer-Olkin Measure of Sampling Adequacy.		0.924488
Bartlett's Test of Sphericity	Approx. Chi-Square	21888.1
	df	15
	Sig.	0
Anti-image Matrices
		Bew_Schwein_zufrieden	Bew_Schwein_glücklich	Bew_Schwein_entspannt	Bew_Schwein_aktiv	Bew_Schwein_gesund	Bew_Schwein_ängstlich
Anti-image Covariance	Bew_Schwein_zufrieden	0.170396	-0.0883227	-0.0659356	-0.0409354	-0.0414294	-0.0324673
	Bew_Schwein_glücklich	-0.0883227	0.197263	-0.0423905	-0.0617388	-0.012637	-0.040644
	Bew_Schwein_entspannt	-0.0659356	-0.0423905	0.238664	-0.0224718	-0.081407	-0.0480733
	Bew_Schwein_aktiv	-0.0409354	-0.0617388	-0.0224718	0.373927	-0.0510897	-0.0452952
	Bew_Schwein_gesund	-0.0414294	-0.012637	-0.081407	-0.0510897	0.397793	-0.0308625
	Bew_Schwein_ängstlich	-0.0324673	-0.040644	-0.0480733	-0.0452952	-0.0308625	0.473088
Anti-image Correlation	Bew_Schwein_zufrieden	.883a	-0.481748	-0.326961	-0.162172	-0.159129	-0.114352
	Bew_Schwein_glücklich	-0.481748	.896a	-0.195367	-0.227322	-0.0451122	-0.133046
	Bew_Schwein_entspannt	-0.326961	-0.195367	.922a	-0.075223	-0.264204	-0.143067
	Bew_Schwein_aktiv	-0.162172	-0.227322	-0.075223	.956a	-0.132468	-0.107693
	Bew_Schwein_gesund	-0.159129	-0.0451122	-0.264204	-0.132468	.951a	-0.0711429
	Bew_Schwein_ängstlich	-0.114352	-0.133046	-0.143067	-0.107693	-0.0711429	.969a
a. Measures of Sampling Adequacy(MSA)
Communalities
	Initial	Extraction
Bew_Schwein_zufrieden	1	0.87175
Bew_Schwein_glücklich	1	0.84822
Bew_Schwein_entspannt	1	0.828425
Bew_Schwein_aktiv	1	0.724979
Bew_Schwein_gesund	1	0.700926
Bew_Schwein_ängstlich	1	0.641925
Extraction Method: Principal Component Analysis.
Total Variance Explained
Component	Initial Eigenvalues			Extraction Sums of Squared Loadings
	Total	% of Variance	Cumulative %	Total	% of Variance	Cumulative %
1	4.61622	76.9371	76.9371	4.61622	76.9371	76.9371
2	0.424667	7.07778	84.0148
3	0.358976	5.98293	89.9978
4	0.294619	4.91031	94.9081
5	0.184375	3.07292	97.981
6	0.12114	2.01899	100
Extraction Method: Principal Component Analysis.
Component Matrixa
	Component
	1
Bew_Schwein_zufrieden	0.933675
Bew_Schwein_glücklich	0.920988
Bew_Schwein_entspannt	0.910179
Bew_Schwein_aktiv	0.851457
Bew_Schwein_gesund	0.837213
Bew_Schwein_ängstlich	0.801202
Extraction Method: Principal Component Analysis.
a. 1 components extracted.
Rotated Component Matrixa
a. Only one component was extracted. The solution cannot be rotated.
DATASET ACTIVATE DataSet1.
SAVE OUTFILE='C:\Users\GBusch\OneDrive - Scientific Network South Tyrol\Meine '+
'Daten\Projekte\Social Lab Eyetracking\Paper 1 ohne Eye\Einreichung\Revision '+
'II\Dataset_RevisionII.sav'
/COMPRESSED.
FACTOR
/VARIABLES Bew_Stall_artgerecht Bew_Stall_natürlich Bew_Stall_angenehm Bew_Stall_zukunftsfähig
Bew_Stall_sauber
/MISSING LISTWISE
/ANALYSIS Bew_Stall_artgerecht Bew_Stall_natürlich Bew_Stall_angenehm Bew_Stall_zukunftsfähig
Bew_Stall_sauber
/PRINT INITIAL CORRELATION KMO AIC EXTRACTION ROTATION
/FORMAT BLANK(.40)
/CRITERIA MINEIGEN(1) ITERATE(25)
/EXTRACTION PC
/CRITERIA ITERATE(25)
/ROTATION VARIMAX
/METHOD=CORRELATION.
Factor Analysis
Notes
Output Created		12-OCT-2018 09:44:28
Comments
Input	Data	C:\Users\GBusch\OneDrive - Scientific Network South Tyrol\Meine Daten\Projekte\Social Lab Eyetracking\Paper 1 ohne Eye\Einreichung\Revision II\Dataset_RevisionII.sav
	Active Dataset	DataSet1
	Filter	<none>
	Weight	<none>
	Split File	<none>
	N of Rows in Working Data File	4076
Missing Value Handling	Definition of Missing	MISSING=EXCLUDE: User-defined missing values are treated as missing.
	Cases Used	LISTWISE: Statistics are based on cases with no missing values for any variable used.
Syntax		FACTOR /VARIABLES Bew_Stall_artgerecht Bew_Stall_natürlich Bew_Stall_angenehm Bew_Stall_zukunftsfähig Bew_Stall_sauber /MISSING LISTWISE /ANALYSIS Bew_Stall_artgerecht Bew_Stall_natürlich Bew_Stall_angenehm Bew_Stall_zukunftsfähig Bew_Stall_sauber /PRINT INITIAL CORRELATION KMO AIC EXTRACTION ROTATION /FORMAT BLANK(.40) /CRITERIA MINEIGEN(1) ITERATE(25) /EXTRACTION PC /CRITERIA ITERATE(25) /ROTAT…
Resources	Processor Time	00:00:00,06
	Elapsed Time	00:00:00,15
	Maximum Memory Required	4248 (4,148K) bytes
Correlation Matrix
		Bew_Stall_artgerecht	Bew_Stall_natürlich	Bew_Stall_angenehm	Bew_Stall_zukunftsfähig	Bew_Stall_sauber
Correlation	Bew_Stall_artgerecht	1	0.889674	0.87778	0.805202	0.57333
	Bew_Stall_natürlich	0.889674	1	0.859164	0.786311	0.543124
	Bew_Stall_angenehm	0.87778	0.859164	1	0.828392	0.636109
	Bew_Stall_zukunftsfähig	0.805202	0.786311	0.828392	1	0.590477
	Bew_Stall_sauber	0.57333	0.543124	0.636109	0.590477	1
KMO and Bartlett's Test
Kaiser-Meyer-Olkin Measure of Sampling Adequacy.		0.886789
Bartlett's Test of Sphericity	Approx. Chi-Square	20294.6
	df	10
	Sig.	0
Anti-image Matrices
		Bew_Stall_artgerecht	Bew_Stall_natürlich	Bew_Stall_angenehm	Bew_Stall_zukunftsfähig	Bew_Stall_sauber
Anti-image Covariance	Bew_Stall_artgerecht	0.153932	-0.085681	-0.0557369	-0.0364659	-0.00802049
	Bew_Stall_natürlich	-0.085681	0.178431	-0.0486164	-0.0291857	0.017977
	Bew_Stall_angenehm	-0.0557369	-0.0486164	0.160521	-0.0666538	-0.0802777
	Bew_Stall_zukunftsfähig	-0.0364659	-0.0291857	-0.0666538	0.276616	-0.0590465
	Bew_Stall_sauber	-0.00802049	0.017977	-0.0802777	-0.0590465	0.580682
Anti-image Correlation	Bew_Stall_artgerecht	.857a	-0.516994	-0.354579	-0.17672	-0.0268267
	Bew_Stall_natürlich	-0.516994	.868a	-0.287264	-0.13137	0.0558487
	Bew_Stall_angenehm	-0.354579	-0.287264	.873a	-0.316315	-0.262941
	Bew_Stall_zukunftsfähig	-0.17672	-0.13137	-0.316315	.931a	-0.147328
	Bew_Stall_sauber	-0.0268267	0.0558487	-0.262941	-0.147328	.936a
a. Measures of Sampling Adequacy(MSA)
Communalities
	Initial	Extraction
Bew_Stall_artgerecht	1	0.880923
Bew_Stall_natürlich	1	0.853626
Bew_Stall_angenehm	1	0.899775
Bew_Stall_zukunftsfähig	1	0.817782
Bew_Stall_sauber	1	0.532262
Extraction Method: Principal Component Analysis.
Total Variance Explained
Component	Initial Eigenvalues			Extraction Sums of Squared Loadings
	Total	% of Variance	Cumulative %	Total	% of Variance	Cumulative %
1	3.98437	79.6874	79.6874	3.98437	79.6874	79.6874
2	0.551583	11.0317	90.719
3	0.23067	4.61341	95.3324
4	0.126779	2.53559	97.868
5	0.1066	2.132	100
Extraction Method: Principal Component Analysis.
Component Matrixa
	Component
	1
Bew_Stall_artgerecht	0.938575
Bew_Stall_natürlich	0.923919
Bew_Stall_angenehm	0.948565
Bew_Stall_zukunftsfähig	0.904313
Bew_Stall_sauber	0.729563
Extraction Method: Principal Component Analysis.
a. 1 components extracted.
Rotated Component Matrixa
a. Only one component was extracted. The solution cannot be rotated.
Your license renewal date has passed. This product will stop working if a new license is not installed soon.
GET
FILE='C:\Users\GBusch\OneDrive - Scientific Network South Tyrol\Meine Daten\Projekte\Social Lab Eyetracking\Paper 1 ohne Eye\Einreichung\Revision II\Dataset_RevisionII_saveModell.sav'.
DATASET NAME DataSet1 WINDOW=FRONT.
RELIABILITY
/VARIABLES=Bew_Schwein_zufrieden Bew_Schwein_glücklich Bew_Schwein_entspannt Bew_Schwein_aktiv
Bew_Schwein_gesund Bew_Schwein_ängstlich
/SCALE('ALL VARIABLES') ALL
/MODEL=ALPHA
/STATISTICS=DESCRIPTIVE
/SUMMARY=TOTAL.
Reliability
Notes
Output Created		29-NOV-2018 10:24:21
Comments
Input	Data	C:\Users\GBusch\OneDrive - Scientific Network South Tyrol\Meine Daten\Projekte\Social Lab Eyetracking\Paper 1 ohne Eye\Einreichung\Revision II\Dataset_RevisionII_saveModell.sav
	Active Dataset	DataSet1
	Filter	<none>
	Weight	<none>
	Split File	<none>
	N of Rows in Working Data File	4076
	Matrix Input	C:\Users\GBusch\OneDrive - Scientific Network South Tyrol\Meine Daten\Projekte\Social Lab Eyetracking\Paper 1 ohne Eye\Einreichung\Revision II\Dataset_RevisionII_saveModell.sav
Missing Value Handling	Definition of Missing	User-defined missing values are treated as missing.
	Cases Used	Statistics are based on all cases with valid data for all variables in the procedure.
Syntax		RELIABILITY /VARIABLES=Bew_Schwein_zufrieden Bew_Schwein_glücklich Bew_Schwein_entspannt Bew_Schwein_aktiv Bew_Schwein_gesund Bew_Schwein_ängstlich /SCALE('ALL VARIABLES') ALL /MODEL=ALPHA /STATISTICS=DESCRIPTIVE /SUMMARY=TOTAL.
Resources	Processor Time	00:00:00,02
	Elapsed Time	00:00:00,02
[DataSet1] C:\Users\GBusch\OneDrive - Scientific Network South Tyrol\Meine Daten\Projekte\Social Lab Eyetracking\Paper 1 ohne Eye\Einreichung\Revision II\Dataset_RevisionII_saveModell.sav
Scale: ALL VARIABLES
Case Processing Summary
		N	%
Cases	Valid	4076	100
	Excludeda	0	0
	Total	4076	100
a. Listwise deletion based on all variables in the procedure.
Reliability Statistics
Cronbach's Alpha	N of Items
0.93989	6
Item Statistics
	Mean	Std. Deviation	N
Bew_Schwein_zufrieden	-0.190628	1.23913	4076
Bew_Schwein_glücklich	-0.342983	1.17505	4076
Bew_Schwein_entspannt	-0.00613346	1.12733	4076
Bew_Schwein_aktiv	-0.294161	1.12727	4076
Bew_Schwein_gesund	0.35525	1.0668	4076
Bew_Schwein_ängstlich	-0.169038	1.05138	4076
Item-Total Statistics
	Scale Mean if Item Deleted	Scale Variance if Item Deleted	Corrected Item-Total Correlation	Cronbach's Alpha if Item Deleted
Bew_Schwein_zufrieden	-0.457066	23.2652	0.897536	0.918719
Bew_Schwein_glücklich	-0.304711	24.0117	0.880258	0.920966
Bew_Schwein_entspannt	-0.64156	24.5922	0.864522	0.923149
Bew_Schwein_aktiv	-0.353533	25.3363	0.786219	0.932742
Bew_Schwein_gesund	-1.00294	26.0348	0.767594	0.934883
Bew_Schwein_ängstlich	-0.478656	26.5784	0.72371	0.939793
RELIABILITY
/VARIABLES=Bew_Stall_artgerecht Bew_Stall_natürlich Bew_Stall_angenehm Bew_Stall_sauber
Bew_Stall_zukunftsfähig
/SCALE('ALL VARIABLES') ALL
/MODEL=ALPHA
/STATISTICS=DESCRIPTIVE
/SUMMARY=TOTAL.
Reliability
Notes
Output Created		29-NOV-2018 10:25:05
Comments
Input	Data	C:\Users\GBusch\OneDrive - Scientific Network South Tyrol\Meine Daten\Projekte\Social Lab Eyetracking\Paper 1 ohne Eye\Einreichung\Revision II\Dataset_RevisionII_saveModell.sav
	Active Dataset	DataSet1
	Filter	<none>
	Weight	<none>
	Split File	<none>
	N of Rows in Working Data File	4076
	Matrix Input
Missing Value Handling	Definition of Missing	User-defined missing values are treated as missing.
	Cases Used	Statistics are based on all cases with valid data for all variables in the procedure.
Syntax		RELIABILITY /VARIABLES=Bew_Stall_artgerecht Bew_Stall_natürlich Bew_Stall_angenehm Bew_Stall_sauber Bew_Stall_zukunftsfähig /SCALE('ALL VARIABLES') ALL /MODEL=ALPHA /STATISTICS=DESCRIPTIVE /SUMMARY=TOTAL.
Resources	Processor Time	00:00:00,05
	Elapsed Time	00:00:00,07
Scale: ALL VARIABLES
Case Processing Summary
		N	%
Cases	Valid	4076	100
	Excludeda	0	0
	Total	4076	100
a. Listwise deletion based on all variables in the procedure.
Reliability Statistics
Cronbach's Alpha	N of Items
0.935469	5
Item Statistics
	Mean	Std. Deviation	N
Bew_Stall_artgerecht	-0.30054	1.39507	4076
Bew_Stall_natürlich	-0.302012	1.3951	4076
Bew_Stall_angenehm	-0.251963	1.34814	4076
Bew_Stall_sauber	0.390334	1.22729	4076
Bew_Stall_zukunftsfähig	-0.243376	1.3092	4076
Item-Total Statistics
	Scale Mean if Item Deleted	Scale Variance if Item Deleted	Corrected Item-Total Correlation	Cronbach's Alpha if Item Deleted
Bew_Stall_artgerecht	-0.407017	21.8748	0.894233	0.907635
Bew_Stall_natürlich	-0.405545	22.117	0.870839	0.912302
Bew_Stall_angenehm	-0.455594	22.1102	0.912011	0.904403
Bew_Stall_sauber	-1.09789	26.1585	0.623354	0.954922
Bew_Stall_zukunftsfähig	-0.464181	23.141	0.844354	0.917549
